# Supplementary material for: Pulmonary fibrosis in patients with autoimmune pulmonary alveolar proteinosis: a retrospective nationwide cohort study
Source: PubMed Central journal article supplement — ERJ Open Res. 2024 Dec 2;10(6):00314-2024. doi: 10.1183/23120541.00314-2024 (PMC11610044; doi:10.1183/23120541.00314-2024), 2024-12-02
Supplement: 00314-2024.SUPPLEMENT.pdf [file 00314-2024.SUPPLEMENT.pdf]

**Supplementary figure 1 – Radiological findings in aPAP**

*Crazy Paving*

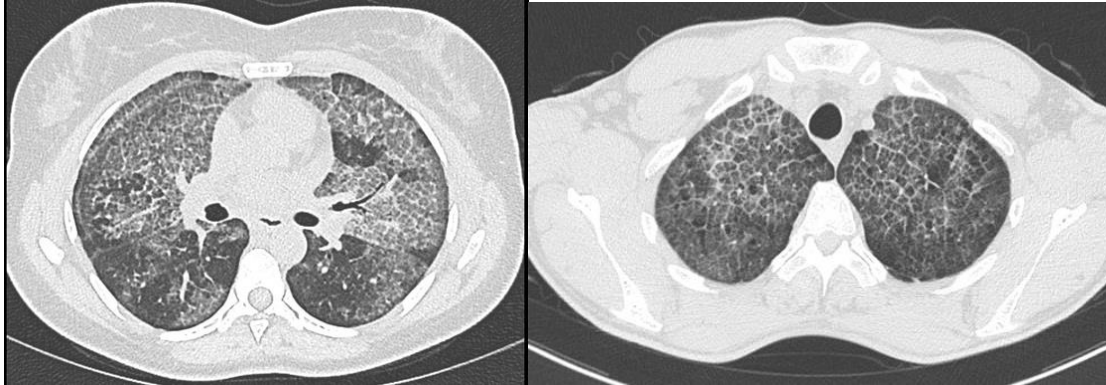

**Supplementary figure 2 – Radiological progression in fibrosis**

*First CT scan on the left and last CT scan on the right*

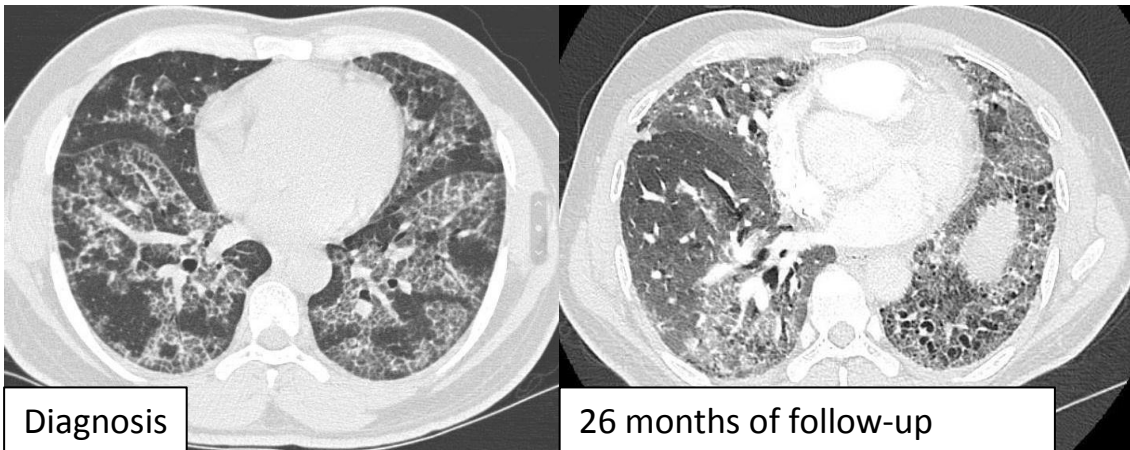

**Appendix 1 - List of participating centers**

| <b>Center</b>             | <b>Number of patients</b> | <b>Local Referent</b>       |
|---------------------------|---------------------------|-----------------------------|
| CHU de Rennes             | 8                         | Pr Stéphane Jouneau         |
| AP-HP, Hôpital Avicenne   | 6                         | Pr Hilario Nunes            |
| CHU de Marseille          | 6                         | Pr Martine Reynaud- Gaubert |
| AP-HP, Hôpital Bichat     | 5                         | Pr Raphaël Borie            |
| CHU de Lyon               | 5                         | Pr Vincent Cottin           |
| CHU de Lille              | 5                         | Dr Lidwine Wémeau           |
| CHU de Nancy              | 4                         | Dr Emmanuel Gomez           |
| CHU de Toulouse           | 4                         | Dr Grégoire Prévot          |
| CHU de Montpellier        | 2                         | Pr Jean-Pierre Mallet       |
| Hôpital Erasme, Bruxelles | 2                         | Pr Benjamin Bondue          |
| AP-HP, Hôpital St Louis   | 2                         | Pr Anne Bergeron            |
| CHU de Tours              | 1                         | Pr Sylvain Marchand-Adam    |
| Chu de Caen               | 1                         | Pr Emmanuel Bergot          |
| CHU de Nice               | 1                         | Pr Charles-Hugo Marquette   |
| CHU de Grenoble           | 1                         | Dr Sébastien Quétant        |
| CHU de Bordeaux           | 1                         | Dr Elodie Blanchard         |
| CHU de Dijon              | 1                         | Pr Philippe Bonniaud        |
| CHU de Strasbourg         | 1                         | Dr Sandrine Hirschi         |
| CH de Bayonne             | 1                         | Dr David Bonnet             |
| CH de Poitiers            | 1                         | Dr Loïc Grandon             |
| CH du Mans                | 1                         | Dr Marie Jouvenot           |
| CHU de Nantes             | 1                         | Dr Stephanie Dirou          |
| CH de Rouen               | 1                         | Pr Luc Thiberville          |
